1 **Restrictions on top speed and nighttime usage substantially decrease the**  
2 **incidence of electric scooter injuries**

3 **Oskari Pakarinen<sup>1</sup> (0000-0002-0159-5830), Arja Kobylin<sup>1</sup>, Veli-Pekka Harjola<sup>1</sup> (0000-0001-5351-0811),**  
4 **Maaret Castrén<sup>1</sup> (0000-0001-7164-4733), Henri Vasara<sup>1</sup> (0000-0002-4438-4523)**

5 1. Department of Emergency Medicine and Services, Helsinki University Hospital and University of  
6 Helsinki, Finland

7 **Author's positions**

8 OP: MD, PhD, registrar

9 AK: MD, Head of the Department of Emergency Medicine and Services

10 VH: MD, PhD, Chief Physician of Emergency Medicine and Services

11 MC: MD, PhD, Head of the Department of Emergency Medicine and Services, Professor of  
12 Emergency Medicine

13 HV:MD, registrar

14

15 Correspondence to: Henri Vasara; [henri.vasara@helsinki.fi](mailto:henri.vasara@helsinki.fi)

16 **Abstract**

17 **Objective:** To investigate the effectiveness of restrictions on top speed and nighttime usage on the incidence  
18 of e-scooter-related injuries.

19 **Design:** A retrospective comparative study. We compared shared e-scooter injuries from two periods:  
20 Unrestricted period (1.1-31.8.2021), and Restricted period (1.1.-31.8.2022).

21 **Setting:** General population of Helsinki, Finland. We collected the data from the electric patient database  
22 from three trauma hospitals representing all public hospitals treating acute trauma patients in Helsinki.

23 **Participants:** All patients with an injury related to shared e-scooter riding sustained in Helsinki

24 **Interventions:** The restrictions established for shared e-scooters during the restricted period were: 1) The  
25 daytime top speed of 20km/h, as opposed to the previous 25km/h, 2) the use of shared e-scooters was  
26 prohibited on Friday and Saturday nights between 12 p.m. and 5 a.m, and 3) the nighttime top speed was  
27 lowered to 15 km/h from Sunday to Thursday between 12 p.m. and 5 a.m., as opposed to 25 km/h.

28 **Main outcome measure:** Proportional incidence of e-scooter injuries compared to the total trips made by e-  
29 scooters.

30 **Results:** There were 528 e-scooter injuries requiring hospital care during the unrestricted period (1.1.-  
31 31.8.2021) and 318 injuries during the restricted period of similar length (1.1.-31.8.2022). The proportional  
32 incidence of e-scooter injuries was 19 (95% CI 17-20) for every 100 000 rides during the unrestricted period  
33 and 9 (95% 8-10) per 100 000 rides during the restricted period. In the risk analysis, the odds ratio (OR) for  
34 shared e-scooter accidents was 0.5 (95% CI 0.4-0.6) for the restricted period when adjusted for hourly  
35 temperature, rain amount, wind speed, and visibility. After introducing the restrictions, the number of e-  
36 scooter injuries decreased significantly between 11 p.m. and 5 a.m.

37 **Conclusions:** Restrictions on the top speed and nighttime usage of e-scooters decreased the amount of e-  
38 scooter injuries. We recommend similar restrictions in cities with shared e-scooter services.

39

## 40 **Background**

41 Electric scooters (e-scooters) have become a popular means of transport in large cities worldwide. Rental  
42 companies providing shared e-scooters have played a major role in the increased use of these vehicles (1).  
43 The e-scooters have the potential to establish themselves as useful and environmental-friendly urban means  
44 of transport. However, in recent years, e-scooter-related accidents have become a serious health issue  
45 worldwide (2–4). As a result, for example, the city of Paris plans to ban e-scooters from September 2023  
46 after a public vote where approximately 90% of participating citizens voted against using these vehicles.

47 Typical e-scooter injuries include head injuries, fractures of extremities, and superficial wounds (5–7), but  
48 life-threatening injuries have also been reported (5,8). The rate of e-scooter injuries increases in late hours  
49 (7,9), and a substantial part of the patients who suffer an injury with an e-scooter are driving intoxicated  
50 (8,9). Accordingly, the need for e-scooter regulations has been brought up in numerous instances (10,11).

51 In 2021, there were 446 e-scooter injuries in the city of Helsinki (12). To limit the injuries caused by e-  
52 scooters, the local government set regulations for shared e-scooter usage in co-operation with the e-scooter  
53 rental companies. These restrictions limited the top speed and nighttime use of e-scooters (13). The objective  
54 of this study was to investigate the effect of these restrictions on the incidence of e-scooter-related injuries.  
55 We hypothesised that the restrictions would decrease the incidence of injuries.

## 56 **Patients and methods**

### 57 *Design*

58 We conducted a retrospective comparative study at the Helsinki University Hospital, where we compared e-  
59 scooter injuries from two periods: 1) Unrestricted period (1.1-31.8.2021), and 2) Restricted period (1.1.-  
60 31.8.2022, with restrictions on e-scooter top speed and availability on nighttime). The restrictions were  
61 introduced at the beginning of September 2021, but we decided to exclude the end of 2021 to have an equal  
62 comparison period (from January to August) with and without restrictions. The data was collected from a  
63 collective electric patient information system from three trauma hospitals representing all public hospitals  
64 treating acute trauma patients in Helsinki: two level I trauma centres and one level IV trauma centre.

### 65 *Setting*

66 The city of Helsinki has 656 920 residents, with a mean age of 41 years (14). Shared e-scooters have been  
67 available since 2019, and the availability of shared e-scooters has since been increasing. In 2021, there were  
68 four operators in action, with an average fleet size in the busiest operational season (May to August) being  
69 6121 shared e-scooters. In comparison, in 2022, there were as many as six operators, with an average fleet  
70 size of 15612 e-scooters, respectively. Users over 18 years old can rent e-scooters with a mobile application.  
71 According to Finnish legislation, the maximum speed of e-scooters is 25 km/h. Wearing a helmet is strongly  
72 advocated but is not controlled publicly. Driving under the influence is forbidden by the law and the rules of  
73 shared e-scooter companies. However, there is no breath alcohol penalisation limit regarding e-scooters,  
74 thus, making effective surveillance inexecutable.

#### 75 *The public intervention*

76 As a countermeasure to the rising number of e-scooter accidents, the city of Helsinki and the e-scooter rental  
77 companies constituted restrictions affecting rental e-scooters in the Helsinki area. On the 3<sup>rd</sup> of September  
78 2021 following restrictions were established to decrease the incidence of injuries:  
79 1) The daytime top speed was limited to 20 km/h as opposed to the previous 25km/h,  
80 2) the use of rental e-scooters was prohibited on Friday and Saturday nights between 12 p.m. and 5 a.m., and  
81 3) the nighttime top speed was lowered to 15 km/h from Sunday to Thursday nights between 12 p.m. and 5  
82 a.m. (13).

#### 83 *Outcome*

84 The primary outcome was the proportional incidence of shared e-scooter injuries compared to the total rides  
85 made by e-scooters. In addition, we compared the proportion of intoxicated drivers, helmet usage, and the  
86 total amount, severity, and temporal aspects of the e-scooter accidents.

#### 87 *Data collection and inclusion*

88 The patients were identified from Helsinki University Hospital data pool utilising a word search from the  
89 emergency department (ED) patient records. We used six e-scooter-related words with their inflected forms  
90 to identify the patients.

91 The ED patient records were investigated manually by authors OP or HV. We included all patients with an  
92 injury related to shared e-scooter riding sustained in Helsinki. Patients injured by private e-scooters and  
93 pedestrians injured by parked e-scooters were not included in the analysis. If intel regarding e-scooter  
94 ownership was unavailable, the patients were included in the analysis. All e-scooter accidents sustained in  
95 another city were excluded regardless of being treated in the Helsinki University Hospital.

96 We recorded patient characteristics and other necessary information regarding the accident from the ED  
97 records. The time of injury was set as accurately as possible according to the ED text. Otherwise, the time of  
98 the injury was set as the time the emergency contact call began or the patient was admitted to the ED. The  
99 patient's most severe injury was graded based on the Abbreviated Injury Score (AIS) from the Abbreviated  
100 Injury Scale (15). The New Injury Severity Score (NISS) was calculated to estimate the total effect of all  
101 injuries on the patient (16). The breath alcohol level was recorded if measured at the ED or ambulance. In  
102 addition, alcohol intoxication was assessed as a binominal value, also considering the clinical assessment of  
103 the ED doctors if the breath alcohol level was not measured.

104 The usage data from the e-scooters was given to us by the Helsinki transport committee from the service  
105 Vianova Cityscope (Vianova SAS, Tournus, France, 2022). The data was handed in following Vianova's  
106 terms of service regarding municipality intellectual property. The anonymised data included the overall  
107 amount of trips, driven distance, and fleet size, reported with hourly accuracy.

108 We sought data from the weather variables from both study periods from the Finnish Meteorological Institute  
109 open data (17). We included measurements from the temperature (°C), visibility (m), rain (mm), and wind  
110 (m/s) reported with hourly accuracy from the Helsinki Kaisaniemi measurement facility.

### 111 *Statistics*

112 We presented nominal values as counts (percentages) and continuous values as medians or means based on  
113 whether the values complied with Gaussian distribution. Medians were reported with interquartile range  
114 (IQR), and means were reported with standard deviation (S.D.). The normality of continuous values was  
115 assessed visually using histograms and Q-Q plots and with the skewness value of the distribution. 95%  
116 confidence intervals (CIs) for proportional injury incidences were calculated using the Wilson score interval.

117 Binary logistic regression on a trip-by-trip basis was used to calculate odds ratios (ORs) with 95% CIs. In  
118 addition, we used Fisher's exact test to test the statistical significance when comparing secondary outcomes.  
119 The analyses were conducted using the statistical program SPSS 29.0.0.0 (IBM corp. released on the 17th of  
120 November, 2022). We set the level for statistical significance as 0.05.

## 121 **Results**

122 Overall, there were 528 e-scooter injuries requiring hospital care during the unrestricted period (1.1.-  
123 31.8.2021) and 318 accidents during the restricted period of similar length (1.1.-31.8.2022), respectively  
124 (Table 1). In total, 73 patients who were injured in another city, 18 patients who were injured by private e-  
125 scooters, and 17 pedestrians who were injured by parked e-scooters, were excluded from the analysis.

126 The proportional incidence of all e-scooter accidents was 19 (95% CI 17-20) for every 100 000 rides during  
127 the unrestricted period and 9 (CI 8-10) per 100 000 rides during the restricted period when the top speed was  
128 lowered to 20km/h and nighttime restrictions were effective (Figure 1). Proportional to driven distance, the  
129 incidence was 9.0 (CI 8.3-9.8) injuries per 100 000km driven in the unrestricted period and 5.4 (CI 4.8-6.0)  
130 per 100 000km in the restricted period.

131 The unadjusted OR for e-scooter injuries was 0.5 (CI 0.4-0.6) for the restricted period compared with the  
132 unrestricted period. When adjusted for hourly temperature (°C), rain amount (mm), wind speed (m/s), and  
133 visibility (km), the OR was 0.5 (CI 0.4-0.6).

134 There were fewer e-scooter injuries between 11 p.m. and 5 a.m. in the restricted period compared with the  
135 unrestricted period (Figure 2). Furthermore, the proportion of intoxicated drivers involved in accidents  
136 decreased from 38% to 31% ( $p<0.001$ ) after introducing the restrictions. The reported proportion of helmet  
137 usage in the injured was 2% before restrictions and 6% after restrictions ( $p=0.08$ ). The proportion of head  
138 injuries was 45% before the restrictions and 40% after the restrictions ( $p=0.11$ ). The accident severity did not  
139 show a detectable difference between the study periods ( $p=0.49$ ) (Table 1).

140 **Table 1:** Characteristics of the study periods

|                                                  | Unrestricted period<br>(1.1-31.8/2021) | Restricted period<br>(1.1.-31.8/2022) | 141 |
|--------------------------------------------------|----------------------------------------|---------------------------------------|-----|
| <b>Patient characteristics</b>                   |                                        |                                       |     |
| <b>Number of injured patients</b>                | 528                                    | 318                                   | 142 |
| E-scooter riders                                 | 499 (95%)                              | 296 (93%)                             |     |
| Pedestrians                                      | 16 (3%)                                | 9 (3%)                                | 143 |
| Cyclist                                          | 12 (2%)                                | 13 (4%)                               |     |
| Other                                            | 1 (<1%)                                | 0                                     |     |
| <b>Patient demographics</b>                      |                                        |                                       |     |
| Age, years, median (IQR)                         | 25 (21-32)                             | 28 (22-37)                            | 144 |
| Male sex                                         | 308 (58%)                              | 191 (60%)                             |     |
| Helmet usage*                                    | 9 (2%)                                 | 20 (6%)                               | 145 |
| <b>Injury location**</b>                         |                                        |                                       |     |
| Head injuries                                    | 236 (45%)                              | 126 (40%)                             |     |
| Upper extremity                                  | 190 (37%)                              | 133 (42%)                             | 146 |
| Lower extremity                                  | 142 (27%)                              | 80 (25%)                              |     |
| Torso                                            | 23 (4%)                                | 20 (6%)                               | 147 |
| <b>Abbreviated injury score (AIS)***</b>         |                                        |                                       |     |
| 1                                                | 334 (64%)                              | 197 (62%)                             |     |
| 2                                                | 150 (29%)                              | 99 (31%)                              | 148 |
| 3                                                | 33 (6%)                                | 22 (7%)                               |     |
| 4                                                | 3 (<1%)                                | 0                                     |     |
| 5                                                | 0                                      | 0                                     | 149 |
| <b>New International Injury Score (NISS)****</b> |                                        |                                       |     |
| Minor (1-8)                                      | 482 (93%)                              | 293 (92%)                             | 150 |
| Moderate (9-14)                                  | 33 (6%)                                | 23 (7%)                               |     |
| High (≥15)                                       | 5 (1%)                                 | 2 (<1%)                               | 151 |
| <b>Alcohol usage****</b>                         |                                        |                                       |     |
| Intoxicated, n (%)                               | 199 (38%)                              | 99 (31%)                              |     |
| Breath alcohol level %, mean (S.D)               | 1.6 (0.6)                              | 1.6 (0.8)                             | 152 |
| <b>Treatment</b>                                 |                                        |                                       |     |
| Transportation with emergency medical services   | 158 (30%)                              | 70 (22%)                              | 153 |
| Patients requiring inpatient care                | 36 (7%)                                | 20 (6%)                               |     |
| Patients requiring intensive care                | 3 (<1%)                                | 3 (1%)                                |     |
| Patients requiring surgery                       | 43 (8%)                                | 24 (8%)                               | 154 |
| Patients requiring follow-up visits              | 184 (35%)                              | 109 (36%)                             |     |
| <b>Non-patient-related characteristics</b>       |                                        |                                       |     |
| <b>Weather</b>                                   |                                        |                                       |     |
| Temperature (°C), mean (S.D.)                    | 8.0 (10.7)                             | 8.3 (9.2)                             |     |
| Rain amount (mm), total                          | 447                                    | 349                                   | 156 |
| Wind speed (m/s), mean (S.D.)                    | 3.9 (1.8)                              | 4.0 (1.8)                             |     |
| Visibility (km), mean (S.D.)                     | 34.2 (16.1)                            | 36.3 (15.6)                           | 157 |
| <b>Trips</b>                                     |                                        |                                       |     |
| Fleet size, median (IQR)                         | 3506 (1025-6524)                       | 11197 (161-15530)                     | 158 |
| Trip amount (n), total                           | 2849668                                | 3412701                               | 159 |
| Distance driven(km), total                       | 5854458                                | 5941200                               | 160 |
|                                                  |                                        |                                       | 161 |

162 \* 165 patients on unrestricted period and 136 patients on restricted period had no information regarding helmet usage available. Patients with missing  
163 values were analysed as not having a helmet.

164 \*\* A single patient might present injuries in multiple locations

165 \*\*\* 8 patients had missing values on the unrestricted period

166 \*\*\*\* 292 patients on unrestricted period and 155 patients on restricted period had no information regarding alcohol intoxication. Patients with missing  
167 values were analysed as not being intoxicated. Breath alcohol levels were calculated from the intoxicated patients.

168

169 **Figure 1:** Incidence of e-scooter injuries per 100 000 rides. Each point represents the average  
170 incidence from the last 30 days. Injuries from periods with less than 10 000 rides in the last 30 days

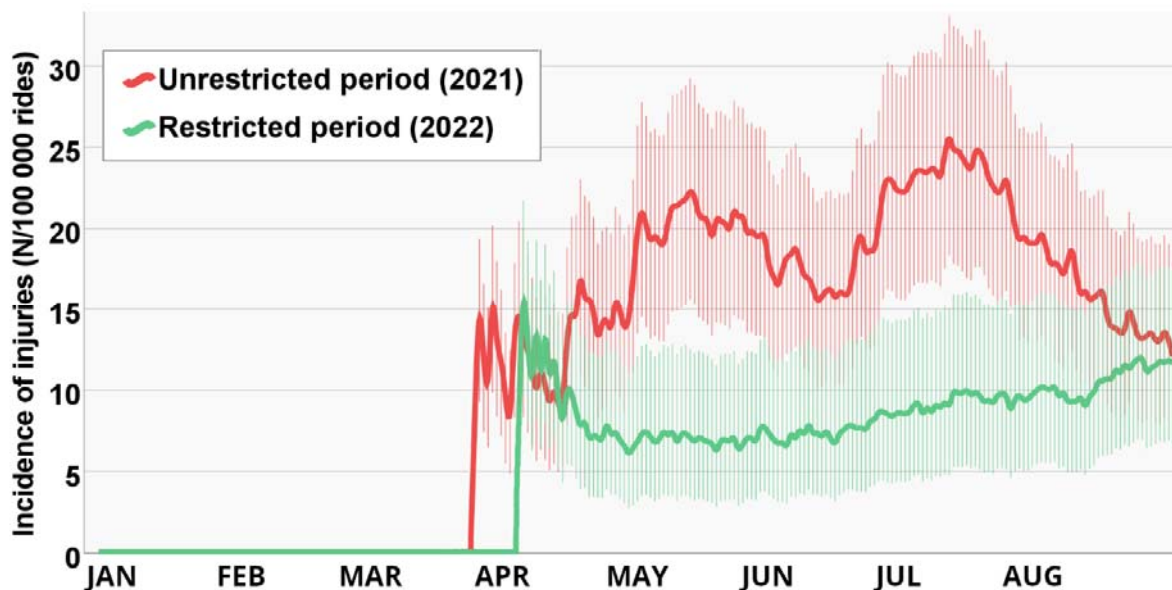

171 are not shown. The vertical lines indicate 95% confidence intervals.

172 The restrictions afflicted:

- 173 1) Maximum speed limit 20km/h
- 174 2) Shared e-scooters were prohibited on Friday and Saturday nights between 12 p.m. and 5 a.m.
- 175 3) A nighttime speed limit of 15km/h for shared e-scooters between 12 p.m. and 5. a.m. from Sunday to Thursday

176 The differences from the 30<sup>th</sup> of April to the 30<sup>th</sup> of May, the 3<sup>rd</sup> of June, the 5<sup>th</sup> of June, the 20<sup>th</sup> of June, the 25<sup>th</sup> of June to the 20<sup>th</sup> of July, and the  
177 23<sup>rd</sup> of July to the 24<sup>th</sup> of July were statistically significant.

178 **Figure 2:** The number of e-scooter injuries at each time of the day. The vertical lines indicate 95%

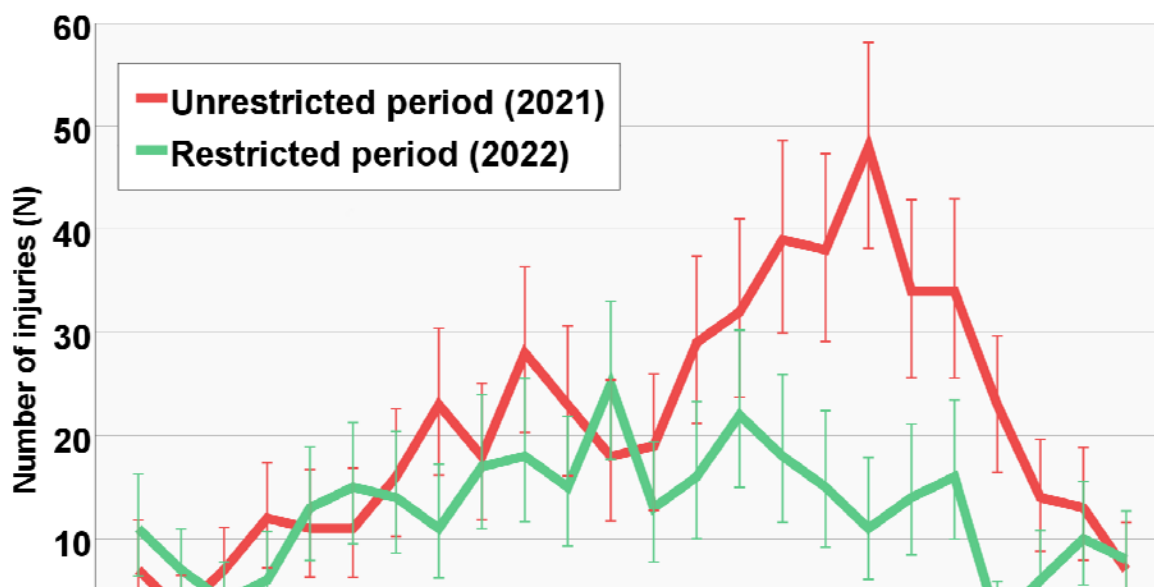



179 confidence intervals

180 The restrictions afflicted:

- 181 1) Maximum speed limit 20km/h  
182 2) Shared e-scooters were prohibited on Friday and Saturday nights between 12 p.m. and 5 a.m.  
183 3) A nighttime speed limit of 15km/h for shared e-scooters between 12 p.m. and 5. a.m. from Sunday to Thursday

184 The differences between 11 p.m. and 5 a.m. were statistically significant.

## 185 **Discussion**

186 We found that the overall incidence of electric scooter injuries in Helsinki was distinctly lower after  
187 implementing restrictions that limited the top speed to 20km/h and restricted the availability of e-scooters at  
188 nighttime. The proportion of nighttime injuries and alcohol-related injuries also decreased. To our  
189 knowledge, this is the first study showcasing the efficacy of speed limitations and nighttime restrictions in  
190 preventing e-scooter injuries.

191

192 The top speed of the e-scooter seems to play an important role in the incidence of injuries. In Tampere, the  
193 third largest city in Finland, the incidence of e-scooter injuries was 18/100 000 trips from April 2019 to April  
194 2021, which is practically equal to our study period with no restrictions (18). During the study period,  
195 Tampere had no specific e-scooter restrictions besides the 25 km/h speed limit. In 2022, the incidence of e-  
196 scooter injuries remained similar in Tampere (17/100 000 trips), even though in September 2021, the  
197 nighttime speed limit was lowered to 15 km/h in central areas, and since June 2022, the nighttime restrictions  
198 covered the whole city, but the daytime top speed was not lowered (19). In other countries, with no distinct  
199 restrictions on e-scooter usage, the rate of injuries is reported to be 20-21 injuries per 100 000 trips (20,21).  
200 On the contrary, Andersson and Djärv reported a lower incidence (3/100 000 trips) in Stockholm, Sweden, in  
201 2019-2020, where the maximum speed limit for e-scooters is 20km/h. (22). Before the restrictions in  
202 Helsinki during the 2021 study period, the e-scooter-related injury incidence was 19/100 000, and after the  
203 restrictions, it decreased to 9/100 000. Lowering the maximum speed of e-scooters, even 5km/h, seems to  
204 decrease the injury burden substantially.

205

206 The primary aim of nighttime restrictions is to limit the number of intoxicated riders, and therefore limit  
207 injuries, as alcohol use has been common in patients suffering e-scooter injuries (23,24). To our knowledge,

208 nighttime restrictions have only been studied in a single study conducted by Anderson et al. in the USA (25).  
209 Ultimately, they did not find evidence of a difference after the infliction of nighttime restrictions, although  
210 there were fewer accidents during the restriction period. In our study, the amount of both nighttime and  
211 alcohol-related injuries decreased after implementing the restrictions. We assume that nighttime restrictions  
212 are especially effective in populations with common evening and night-focused excessive alcohol usage.  
213 However, based on the literature discussed in the previous chapter, the limitation of overall top speed might  
214 be a more efficient method to decrease the overall injury burden.

215

216 The main uncertainty regarding our results is related to the possible bias caused by a learning curve  
217 regarding the use of e-scooters and the effect of increasing awareness related to the risks of these vehicles.  
218 Although it was impossible to adjust these phenomena, we consider that the effect of learning is minor  
219 compared to the restrictions. In Tampere, Finland, a city with a similar population and behavioural habits to  
220 Helsinki, the incidence of injuries remained fairly the same between 2019 and 2022, when there were no  
221 major restrictions (19). In addition, Williams et al. reported that the number of monthly rides and e-scooter-  
222 related emergency department visits correlated well, and there was no detectable decrease or increase in the  
223 monthly injury incidence during their study period from 8/2018 to 12/2019 (21). A study published by Farley  
224 et al. reported that the number of e-scooter injuries increased in the first three years after the introduction of  
225 shared e-scooters (11). Overall, these studies indicate that injury incidence tends not to decrease  
226 automatically during the long-term availability of e-scooters.

227

228 Other limitations of our study arise mainly due to its retrospective design. First, as we do not have a  
229 functional registry for e-scooter accidents, we had to rely on a word search from the hospital database.  
230 Therefore, not all accidents might have been collected. However, this limitation is similar during both study  
231 periods. Second, the intel regarding the ownership of the e-scooters was reported infrequently. Although we  
232 excluded injuries that were related to privately owned e-scooter according to the ED text, it is likely that our  
233 results still include an unknown proportion of injuries related to personally owned e-scooters. However,  
234 because privately owned e-scooters have also become more popular, it is unlikely that they would have

235 caused a higher injury incidence in 2021 compared to 2022. Finally, some variables, for example, helmet  
236 use, were not routinely reported and cannot be compared reliably between the two periods.

## 237 **Conclusions**

238 Even minimal restrictions on the top speed and nighttime usage of e-scooters seem to decrease the amount of  
239 hospital care requiring e-scooter injuries substantially. We recommend considering similar restrictions in  
240 cities where rental e-scooters are available.

## 241 **List of abbreviations**

242 E-scooter = Stand-up electric scooter

243 ED = Emergency department

244 AIS = Abbreviated Injury Score

245 NISS = New Injury Severity Score

246 IQR = Inter Quartile Range

247

## 248 **Declarations**

### 249 **Ethics approval and consent to participate**

250 Organisational approval was gained from Helsinki University Hospital research board (HUS/44/2021).

251 Based on Finnish legislation on medical research, utilising public and published data, registry and

252 documentary data, and archive data do not require ethical board processing. Therefore, the research board

253 exempted this study from requiring an ethical committee review and waived the need for informed consent to

254 participate. We did not contact any patients, and all data was handled pseudonymised.

### 255 **Availability of data and materials**

256 The data used in the study is available from a reasonable request.

### 257 **Competing interests**

258 All authors have completed the ICMJE uniform disclosure form at <http://www.icmje.org/disclosure-of->

259 interest/ and declare: no support from any organisation for the submitted work; no financial relationships

260 with any organisations that might have an interest in the submitted work in the previous three years; no other  
261 relationships or activities that could appear to have influenced the submitted work.

## 262 **Transparency declaration**

263 The lead author HV affirms that this manuscript is an honest, accurate, and transparent account of the study  
264 being reported. No important aspects of the study have been omitted and any discrepancies from the study as  
265 planned have been explained.

## 266 **Patient and Public Involvement Statement**

267 The patients and public were not involved

## 268 **Funding**

269 The study did not receive any external funding.

## 270 **Authors' contributions**

271 HV planned and organised the study, data collection, and manuscript writing. OP and HV collected the data.  
272 OP and HV wrote the initial manuscript. HV analysed the data, and produced the figures . AK, MC and V-  
273 PH commented on the study protocol. All authors took part in the interpretation of the data.All authors  
274 revised, and approved the manuscript. HV acts as the guarantor for the work.

## 275 **Acknowledgements**

276 We wish to thank the biostatistician Hanna Granroth-Wilding for the consultation services and  
277 Linda Toppari for the help with data collection. In addition, we wish to thank the city of Helsinki  
278 and the e-scooter operators for their co-operation in establishing the restrictions. We thank Helsinki  
279 Urban Environment Division for providing the e-scooter usage data.

## 280 **References**

- 281 1. Haworth N, Schramm A, Twisk D. Changes in shared and private e-scooter use in Brisbane, Australia  
282 and their safety implications. *Accid Anal Prev*. 2021 Dec;163:106451.  
283 DOI:10.1016/j.aap.2021.106451
- 284 2. Shichman I, Shaked O, Factor S, Weiss-Meilik A, Khoury A. Emergency department electric scooter  
285 injuries after the introduction of shared e-scooter services: A retrospective review of 3,331 cases.  
286 *World J Emerg Med*. 2022 Jan 1;13(1):5–10. DOI:10.5847/WJEM.J.1920-8642.2022.002
- 287 3. Badeau A, Carman C, Newman M, Steenblik J, Carlson M, Madsen T. Emergency department visits  
288 for electric scooter-related injuries after introduction of an urban rental program. *American Journal of*  
289 *Emergency Medicine*. 2019 Aug 1;37(8):1531–3. DOI:10.1016/j.ajem.2019.05.003
- 290 4. Farley KX, Aizpuru M, Wilson JM, Daly CA, Xerogeanes J, Gottschalk MB, et al. Estimated  
291 Incidence of Electric Scooter Injuries in the US From 2014 to 2019. *JAMA Netw Open*. 2020;3(8).  
292 DOI:10.1001/jamanetworkopen.2020.14500
- 293 5. Trivedi TK, Liu C, Anna ;, Antonio LM, Wheaton N, Kreger V, et al. Injuries Associated With  
294 Standing Electric Scooter Use. *JAMA Netw Open*. 2019;2(1):187381.  
295 DOI:10.1001/jamanetworkopen.2018.7381
- 296 6. Coelho A, Feito P, Corominas L, Francisco Sánchez-Soler J, Pérez-Prieto D, Martínez-Díaz S, et al.  
297 Electric Scooter-Related Injuries: A New Epidemic in Orthopedics. *Clinical Medicine*. 2021;10(15).  
298 DOI:10.3390/jcm10153283
- 299 7. Moftakhar T, Wanzel M, Vojcsik A, Kralinger F, Mousavi M, Hajdu S, et al. Incidence and severity  
300 of electric scooter related injuries after introduction of an urban rental programme in Vienna: a  
301 retrospective multicentre study. *Arch Orthop Trauma Surg*. 2021 Jul 1;141(7):1207–13.  
302 DOI:10.1007/s00402-020-03589-y
- 303 8. Siow MY, Lavoie-Gagne O, Politzer CS, Mitchell BC, Harkin WE, Flores AR, et al. Electric Scooter  
304 Orthopaedic Injury Demographics at an Urban Level I Trauma Center. *J Orthop Trauma*. 2020 Nov  
305 1;34(11):e424–9. DOI:10.1097/BOT.0000000000001803
- 306 9. Suominen EN, Antti -, Sajanti J, Silver EA, Koivunen V, Bondfolk AS, et al. Alcohol intoxication  
307 and lack of helmet use are common in electric scooter-related traumatic brain injuries: a consecutive  
308 patient series from a tertiary university hospital. *Acta Neurochir*. 2022 Mar;164:643–53.  
309 DOI:10.1007/s00701-021-05098-2
- 310 10. Crowe B Sen, Elkbuli A. Electric scooter-related injuries: the desperate need for regulation. *American*  
311 *Journal of Emergency Medicine*. 2021; DOI:10.1016/J.AJEM.2021.01.014
- 312 11. Farley KX, Aizpuru M, Wilson JM, Daly CA, Xerogeanes J, Gottschalk MB, et al. Estimated  
313 Incidence of Electric Scooter Injuries in the US From 2014 to 2019. *JAMA Netw Open*. 2020;3(8).  
314 DOI:10.1001/jamanetworkopen.2020.14500
- 315 12. Vasara H, Toppari L, Harjola V-P, Virtanen K, Castrén M, Kobylín A. Characteristics and costs of  
316 electric scooter injuries in Helsinki: a retrospective cohort study. *Scand J Trauma, Resusc Emerg*  
317 *Med*. 2022;30(57). DOI:10.1186/s13049-022-01042-0.
- 318 13. The City of Helsinki Urban environment services. Vuokrattavien sähköpotkulautojen käyttöä  
319 viikonloppuisin ja nopeuksia rajoitetaan Helsingissä (News report in Finnish) [Internet]. The Finnish  
320 News Agency STT. 2021 [cited 2023 Jun 13]. Available from:

- 321 [https://www.sttinfo.fi/tiedote/vuokrattavien-sahkopotkulautojen-kayttoa-viikonloppuoinis-ja-  
nopeuksia-rajoitetaan-helsingissa?publisherId=60577852&releaseId=69917660](https://www.sttinfo.fi/tiedote/vuokrattavien-sahkopotkulautojen-kayttoa-viikonloppuoinis-ja-<br/>322 nopeuksia-rajoitetaan-helsingissa?publisherId=60577852&releaseId=69917660)
- 323 14. Jaakkola A, Vass T, Saarto S, Haglund L. Tilastotietoa Helsingistä 2021 [Internet]. Helsingin  
324 kaupunginkanslia, kaupunkitietoyksikkö. 2021 [cited 2022 Apr 25]. Available from:  
325 [https://www.hel.fi/hel2/tietokeskus/julkaisut/pdf/21\\_06\\_09\\_Tilastotietoja\\_Helsingist%C3%A4\\_2021.  
pdf](https://www.hel.fi/hel2/tietokeskus/julkaisut/pdf/21_06_09_Tilastotietoja_Helsingist%C3%A4_2021.<br/>326 pdf)
- 327 15. Association for the Advancement of Automotive Medicine. The Abbreviated Injury Scale 2015  
328 revision. Chicago, IL.; 2015.
- 329 16. Osler T, Baker SP, Long W. A Modification of the Injury Severity Score That Both Improves  
330 Accuracy and Simplifies Scoring. *Journal of Trauma and Acute Care Surgery*. 1997;43(6).
- 331 17. Finnish Meteorological Institute. Open data [Internet]. [cited 2023 Jun 20]. Available from:  
332 <https://en.ilmatieteenlaitos.fi/download-observations>
- 333 18. Reito A, Öljymäki E, Franssila M, Mattila VM. Incidence of Electric Scooter–Associated Injuries in  
334 Finland From 2019 to 2021. *JAMA Netw Open*. 2022 Apr 14;5(4):e227418–e227418.  
335 DOI:10.1001/jamanetworkopen.2022.7418
- 336 19. Working group set up by the City of Tampere Urban environment services (Report in Finnish).  
337 Sähköpotkulautailun turvallisuuden edistäminen Tampereella [Internet]. Tampere; 2023 Jan [cited  
338 2023 Jun 13]. Available from:  
339 [https://www.traficom.fi/sites/default/files/media/file/Tampere\\_Sahkopotkulautailun\\_turvallisuuden\\_e  
distaminen\\_loppuraportti.pdf](https://www.traficom.fi/sites/default/files/media/file/Tampere_Sahkopotkulautailun_turvallisuuden_e<br/>340 distaminen_loppuraportti.pdf)
- 341 20. Bekhit MNZ, Le Fevre J, Bergin CJ. Regional healthcare costs and burden of injury associated with  
342 electric scooters. *Injury*. 2020 Feb 1;51(2):271–7. DOI:10.1016/j.injury.2019.10.026
- 343 21. Williams C, Bitter CC, Lorber S, Overfelz CR, Zehfus H, Spangler A, et al. Incidence of Emergency  
344 Department Visits for Electric Rental Scooters Using Detailed Ridership Data. *West J Emerg Med*  
345 [Internet]. 2022 [cited 2023 Jun 20];23(2):1374–82. Available from:  
346 <https://escholarship.org/uc/item/3cn2x60xDOI:10.5811/westjem.2021.6.51101>
- 347 22. Andersson O, Djärv T. Electric scooter accidents leading to emergency department visits: influence  
348 of alcohol and outcomes in Stockholm, Sweden. *Sci Rep*. 2023 Apr;13(1):5946.  
349 DOI:10.1038/s41598-023-32857-1
- 350 23. Siow MY, Lavoie-Gagne O, Politzer CS, Mitchell BC, Harkin WE, Flores AR, et al. Electric Scooter  
351 Orthopaedic Injury Demographics at an Urban Level I Trauma Center. *J Orthop Trauma*. 2020  
352 Nov;34(11):e424–9. DOI:10.1097/BOT.0000000000001803
- 353 24. Suominen EN, Sajanti AJ, Silver EA, Koivunen V, Bondfolk AS, Koskimäki J, et al. Alcohol  
354 intoxication and lack of helmet use are common in electric scooter-related traumatic brain injuries: a  
355 consecutive patient series from a tertiary university hospital. *Acta Neurochir (Wien)*. 2022  
356 Mar;164(3):643–53. DOI:10.1007/s00701-021-05098-2
- 357 25. Anderson B, Rupp JD, Moran TP, Hudak LA, Wu DT. The effect of nighttime rental restrictions on  
358 E-scooter injuries at a large urban tertiary care center. *Int J Environ Res Public Health*. 2021 Oct  
359 1;18(19). DOI:10.3390/IJERPH181910281
- 360

Incidence of injuries (N/100 000 rides)

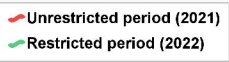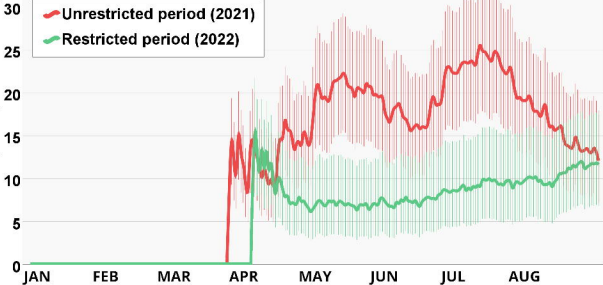

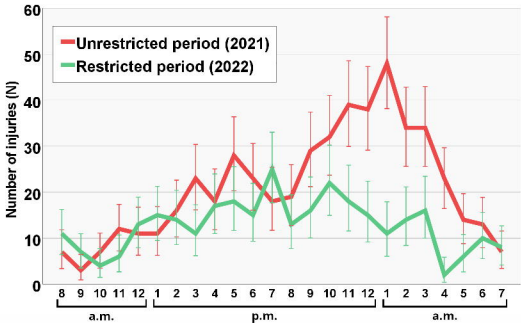

Source: https://medrxiv.org/content/10.1101/2023.06.20.23291641v1.full.pdf
